# Supplementary material for: Facile surface modification of LSCF/GDC cathodes by epitaxial deposition of Sm0.5Sr0.5CoO3via ultrasonic spray infiltration
Source: Royal Society of Chemistry journal article supplement (doi:10.1039/c9ta11704k), 2020-01-01
Supplement: c9ta11704k1.pdf [file c9ta11704k1.pdf]

Supplementary information for

Facile surface modification of LSCF/GDC cathodes by epitaxial deposition of  $\text{Sm}_{0.5}\text{Sr}_{0.5}\text{CoO}_3$  via  
ultrasonic spray infiltration

You-Hwa Song<sup>a,b,1</sup>, Saeed Ur Rehman<sup>a,1</sup>, Hye-Sung Kim<sup>a,1</sup>, Ho-Seon Song<sup>a,b</sup>, Rak-Hyun Song<sup>a,c</sup>,  
Tak-Hyoung Lim<sup>a,c</sup>, Jong-Eun Hong<sup>a</sup>, Seok-Joo Park<sup>a,c</sup>, Joo-Youl Huh<sup>b</sup>, Seung-Bok Lee<sup>a,c\*</sup>

<sup>a</sup>*Fuel Cell Laboratory, New and Renewable Energy Research Division, Korea Institute of Energy  
Research, 152 Gajeong-ro, Yuseong-gu, Daejeon 34129, Republic of Korea*

<sup>b</sup>*Department of Material Science and Engineering, Korea University, 145 Anam-ro, Seongbuk-gu,  
Seoul 02841, Republic of Korea*

<sup>c</sup>*Department of Advanced Energy and Technology, Korea University of Science and Technology, 217  
Gajeong-ro, Yuseong-gu, Daejeon 34113, Republic of Korea*

\* Corresponding author:

*E-mail address:* sblee@kier.re.kr (S.B. Lee)

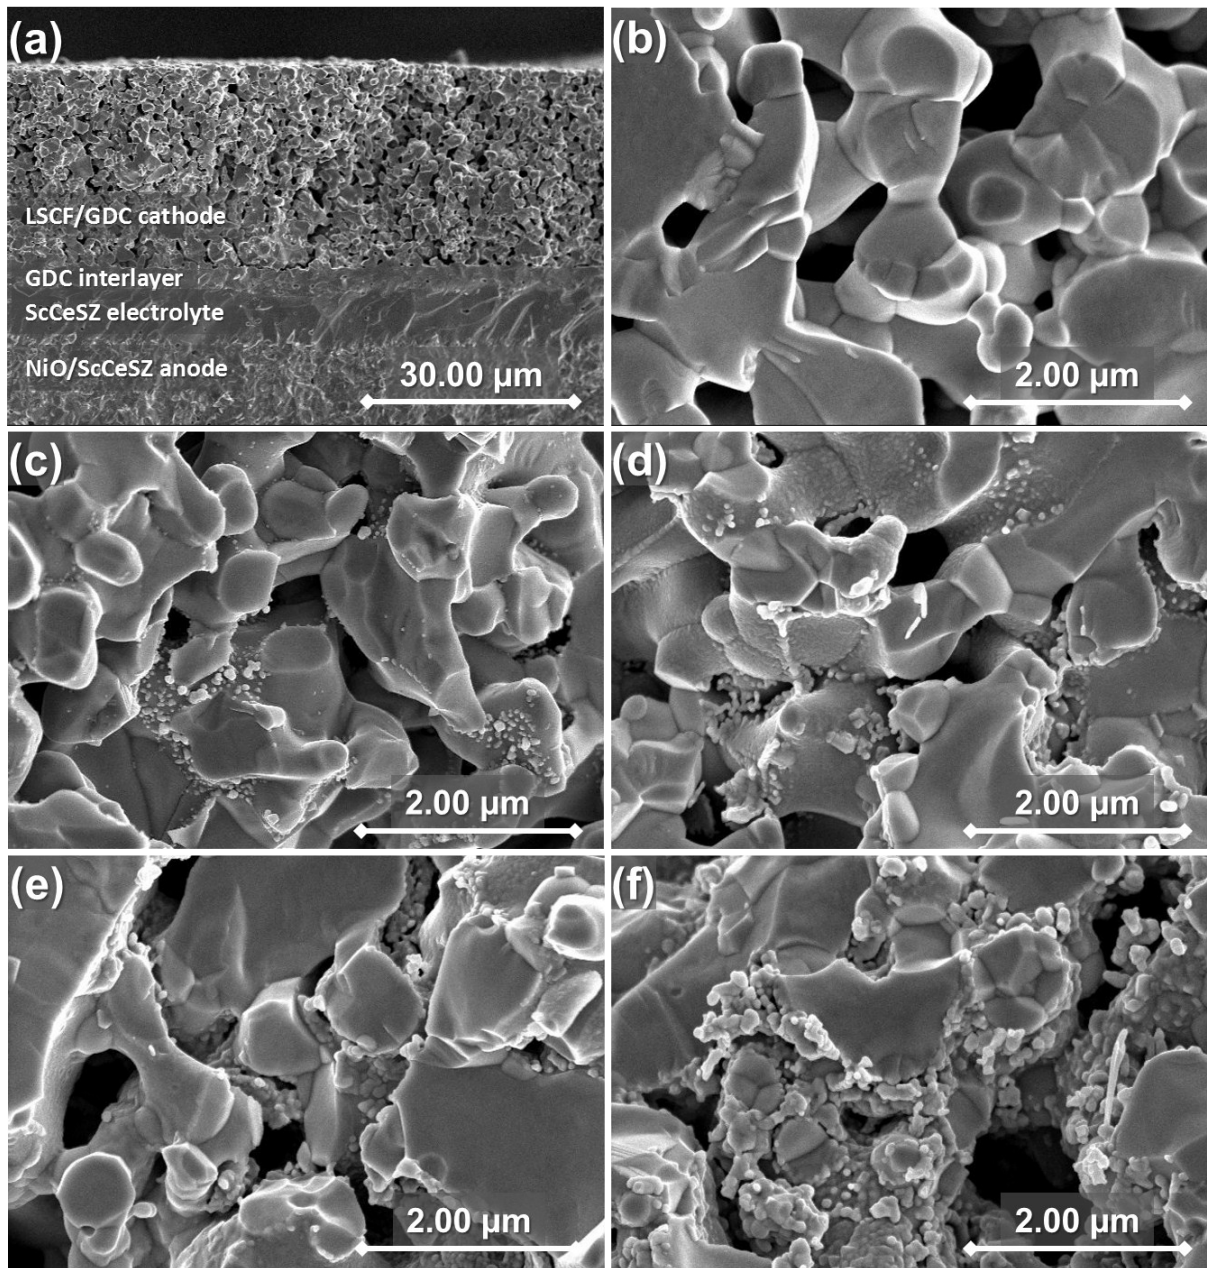

Figure S1: Cross-sectional SEM images of (a) a flat tubular anode-supported SOFC and LSCF/GDC cathodes of (b) Cell-1, (c) Cell-2, (d) Cell-3, (e) Cell-4, and (f) Cell-5.

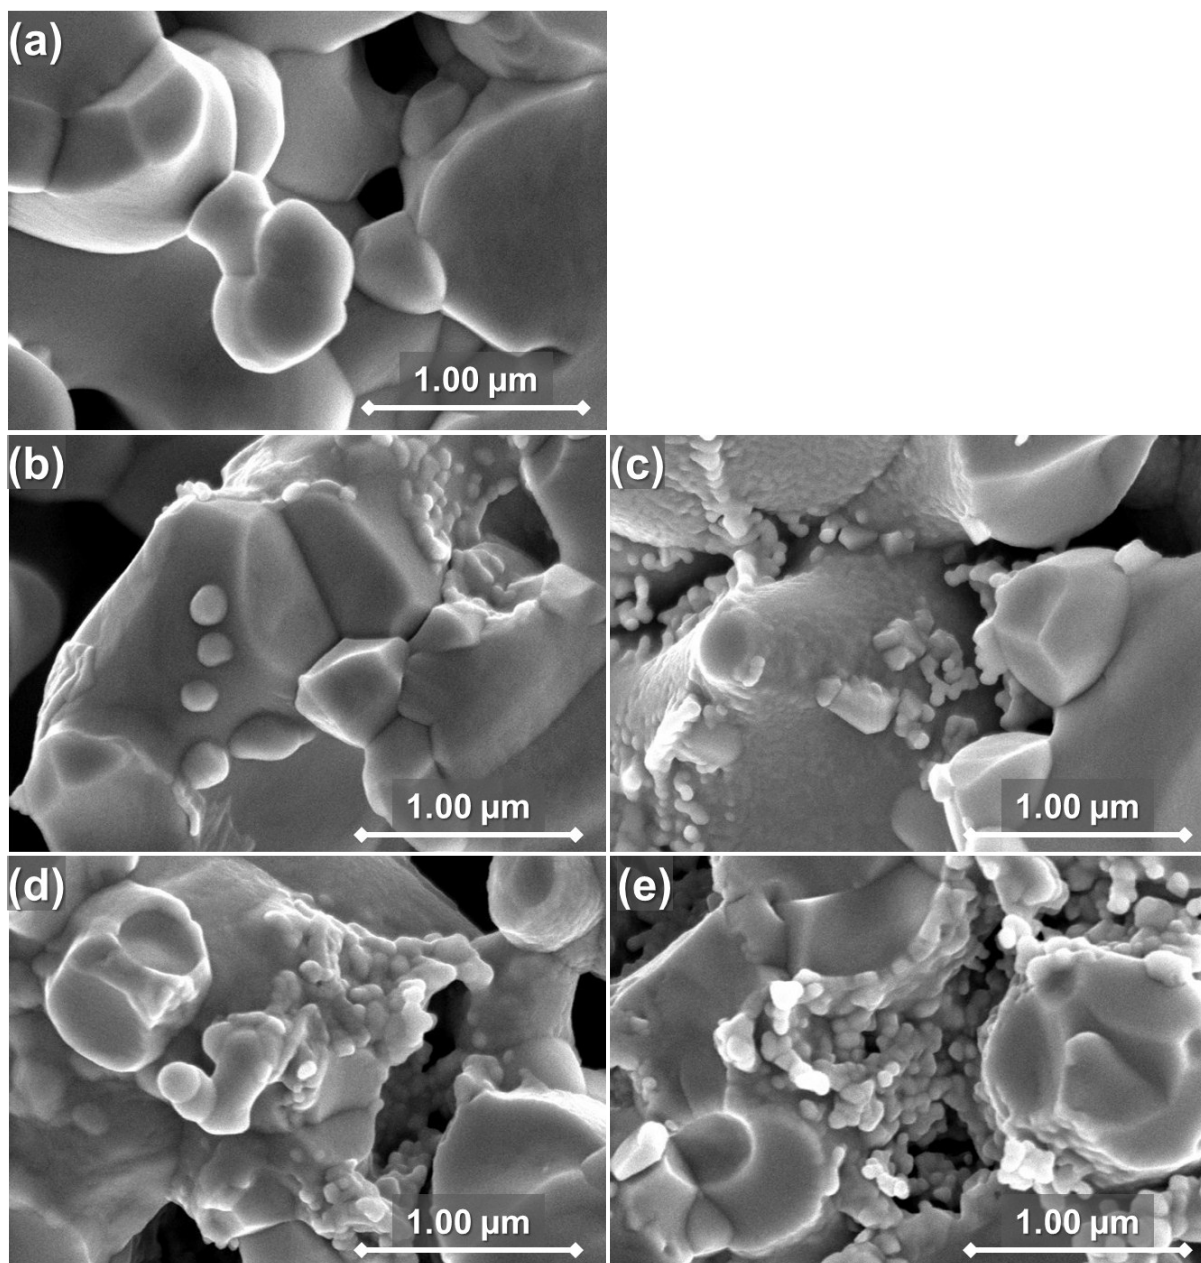

Figure S2: High resolution cross-sectional SEM images of LSCF/GDC cathodes of (a) Cell-1, (b) Cell-2, (c) Cell-3, (d) Cell-4, and (e) Cell-5

Table S1: SSC catalyst loading in LSCF/GDC cathode of various cells after calcination at 850 °C

| <b>Sample</b>        | <b>Cell-2</b> | <b>Cell-3</b> | <b>Cell-4</b> | <b>Cell-5</b> |
|----------------------|---------------|---------------|---------------|---------------|
| Infiltrated SSC (mg) | 1.1           | 0.5           | 1.1           | 1.51          |

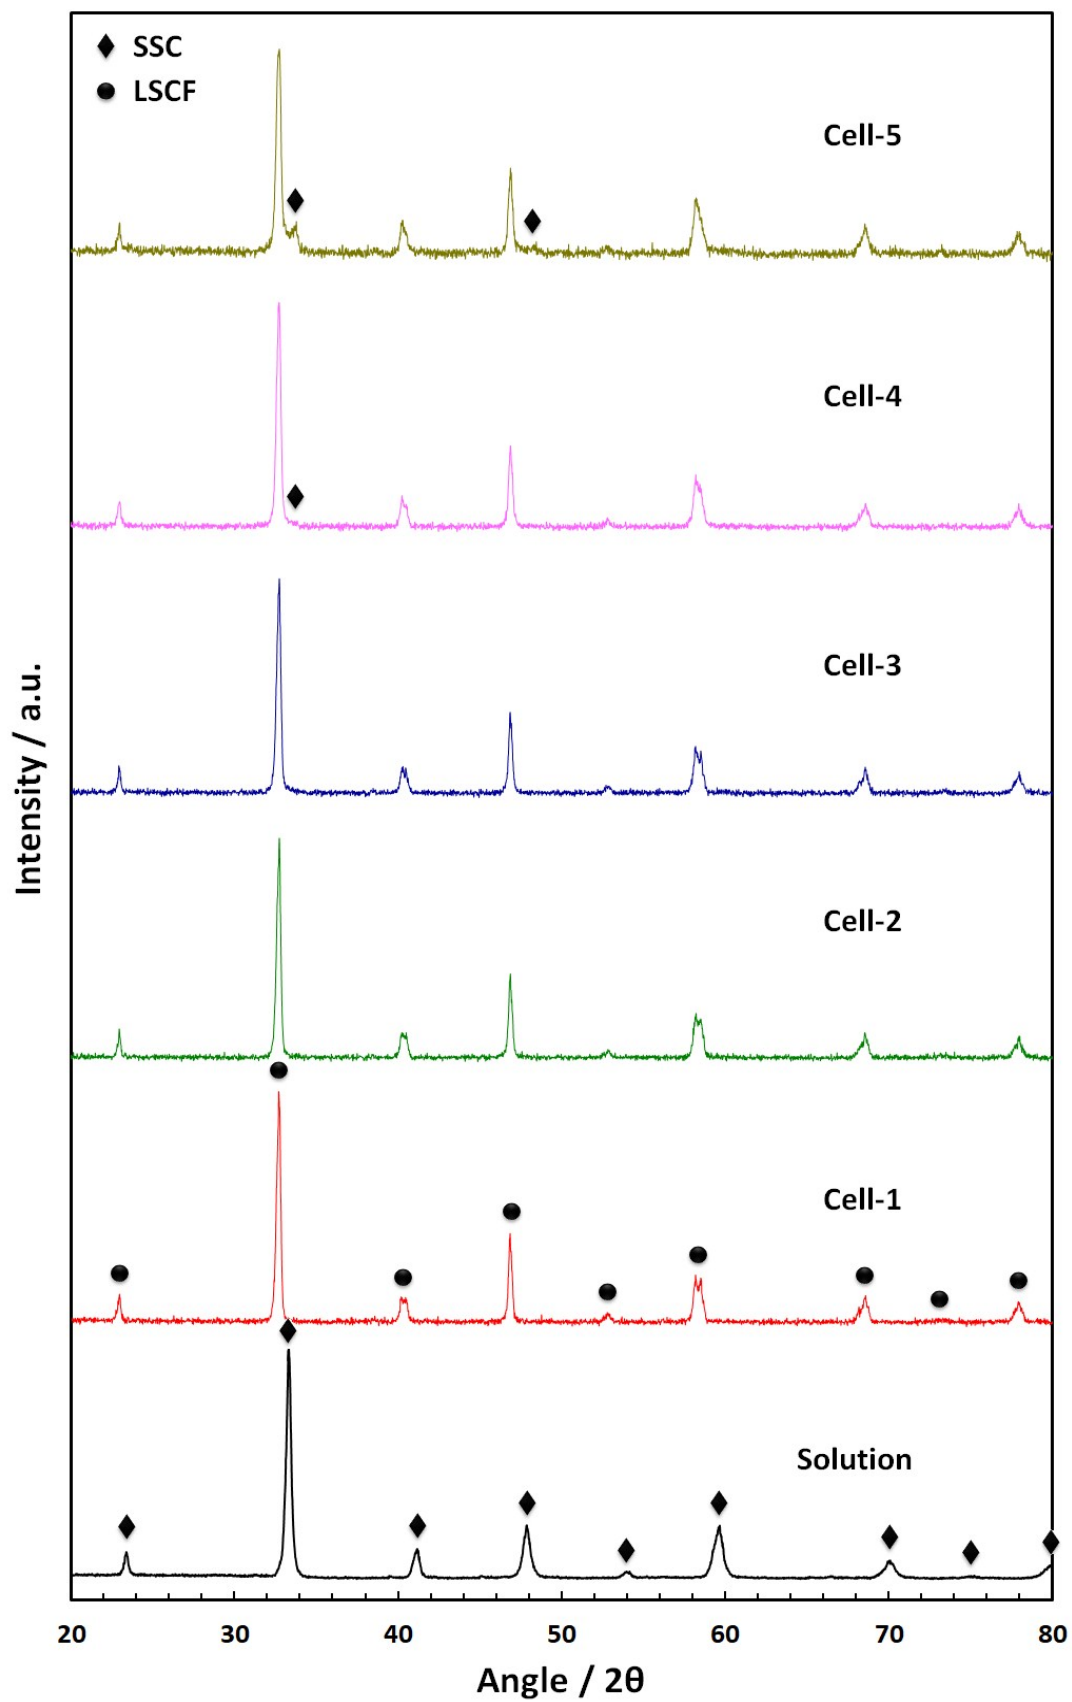

Figure S3: XRD analysis of SSC solution and LSCF-GDC composite cathodes having SSC infiltrated by micropipette/ultrasonic-spray after calcination at 850 °C.

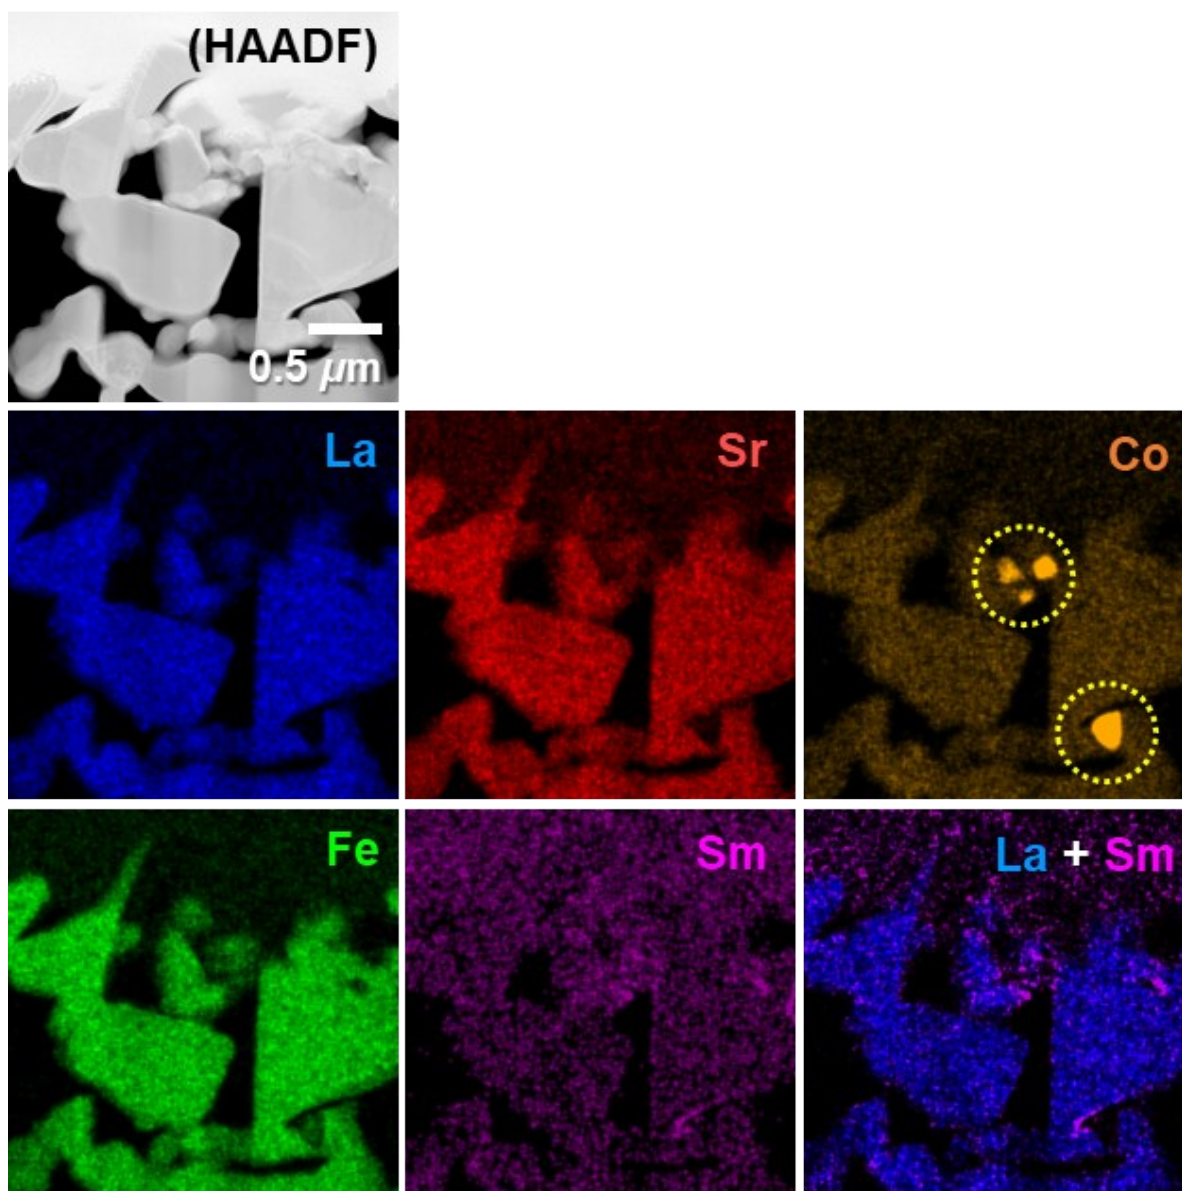

Figure S4: Additional sets of HAADF-STEM EDS chemical maps for SSC-infiltrated LSCF/GDC cathode consistently verify the presence of Co-rich particles (yellow dotted circle).

Table S2: Quantitative composition analysis for top (SSC) and bottom (LSCF) area.

|                  |                                                               | Position No. |      |      |      |      | Avg.        |
|------------------|---------------------------------------------------------------|--------------|------|------|------|------|-------------|
|                  |                                                               | 1            | 2    | 3    | 4    | 5    |             |
| Top<br>(SSC)     | $\frac{[\text{Sm}]}{[\text{Sr}]}$                             | 1.06         | 1.13 | 1.14 | 0.98 | 1.02 | <b>1.06</b> |
| Bottom<br>(LSCF) | $\frac{[\text{Co}] + [\text{Fe}]}{[\text{La}] + [\text{Sr}]}$ | 1.11         | 0.95 | 0.89 | 1.32 | 0.98 | <b>1.05</b> |

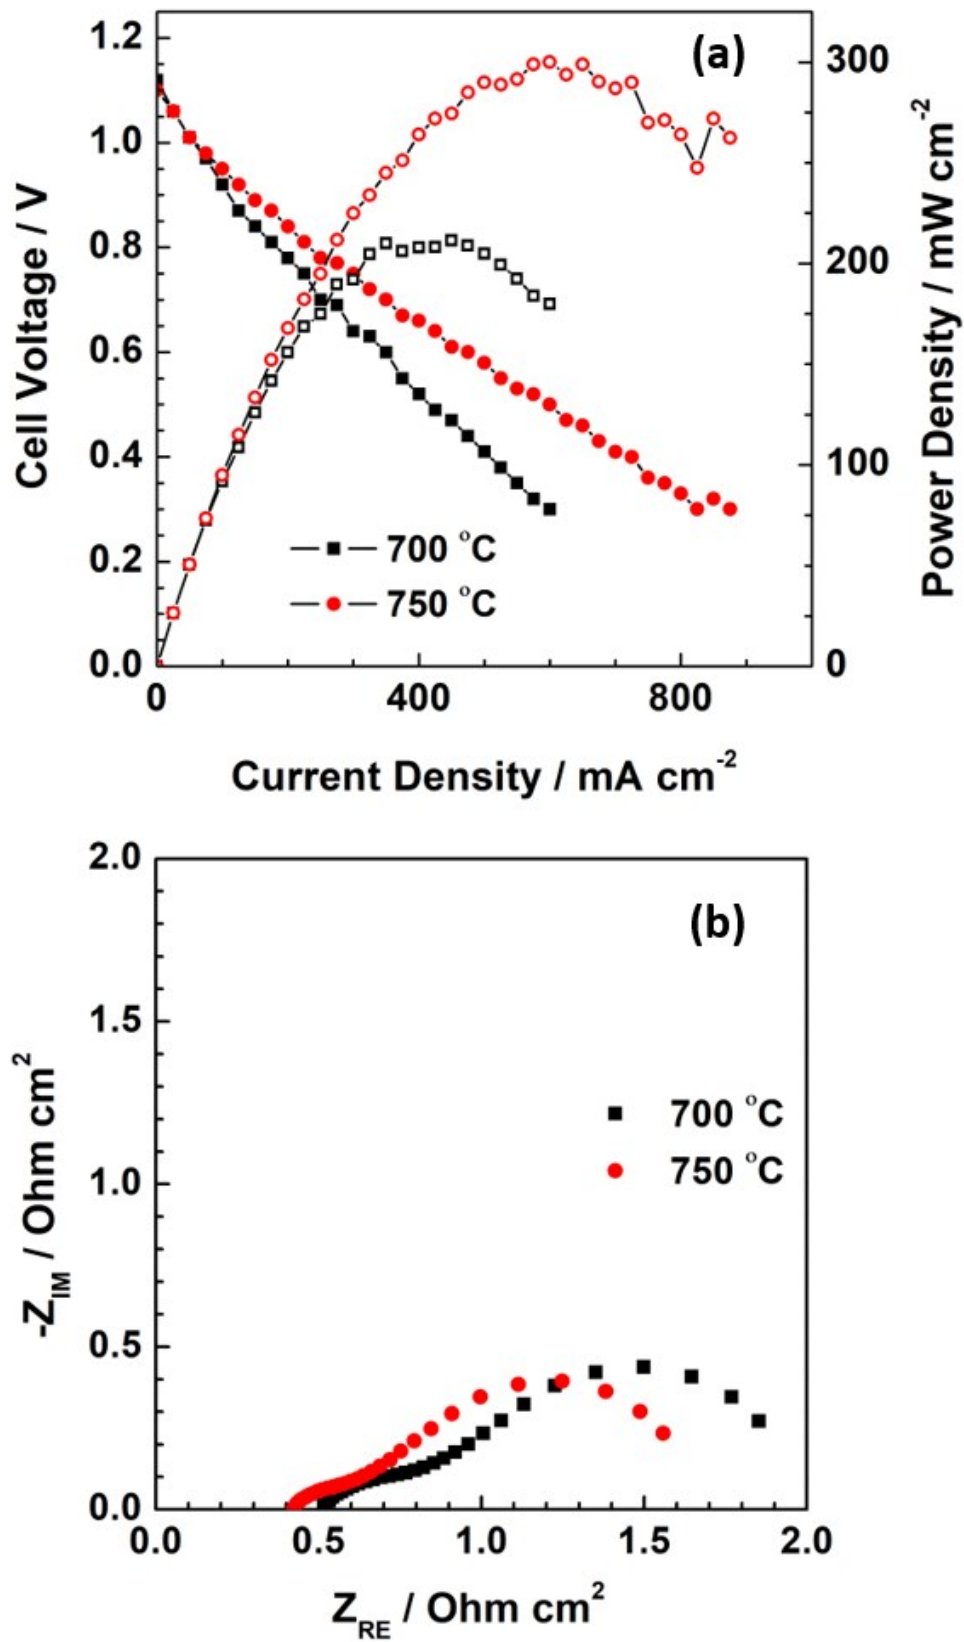

Figure S5: Electrochemical performance of Cell-1 at 700 and 750 °C; (a) polarization curves and (b) impedance plots.



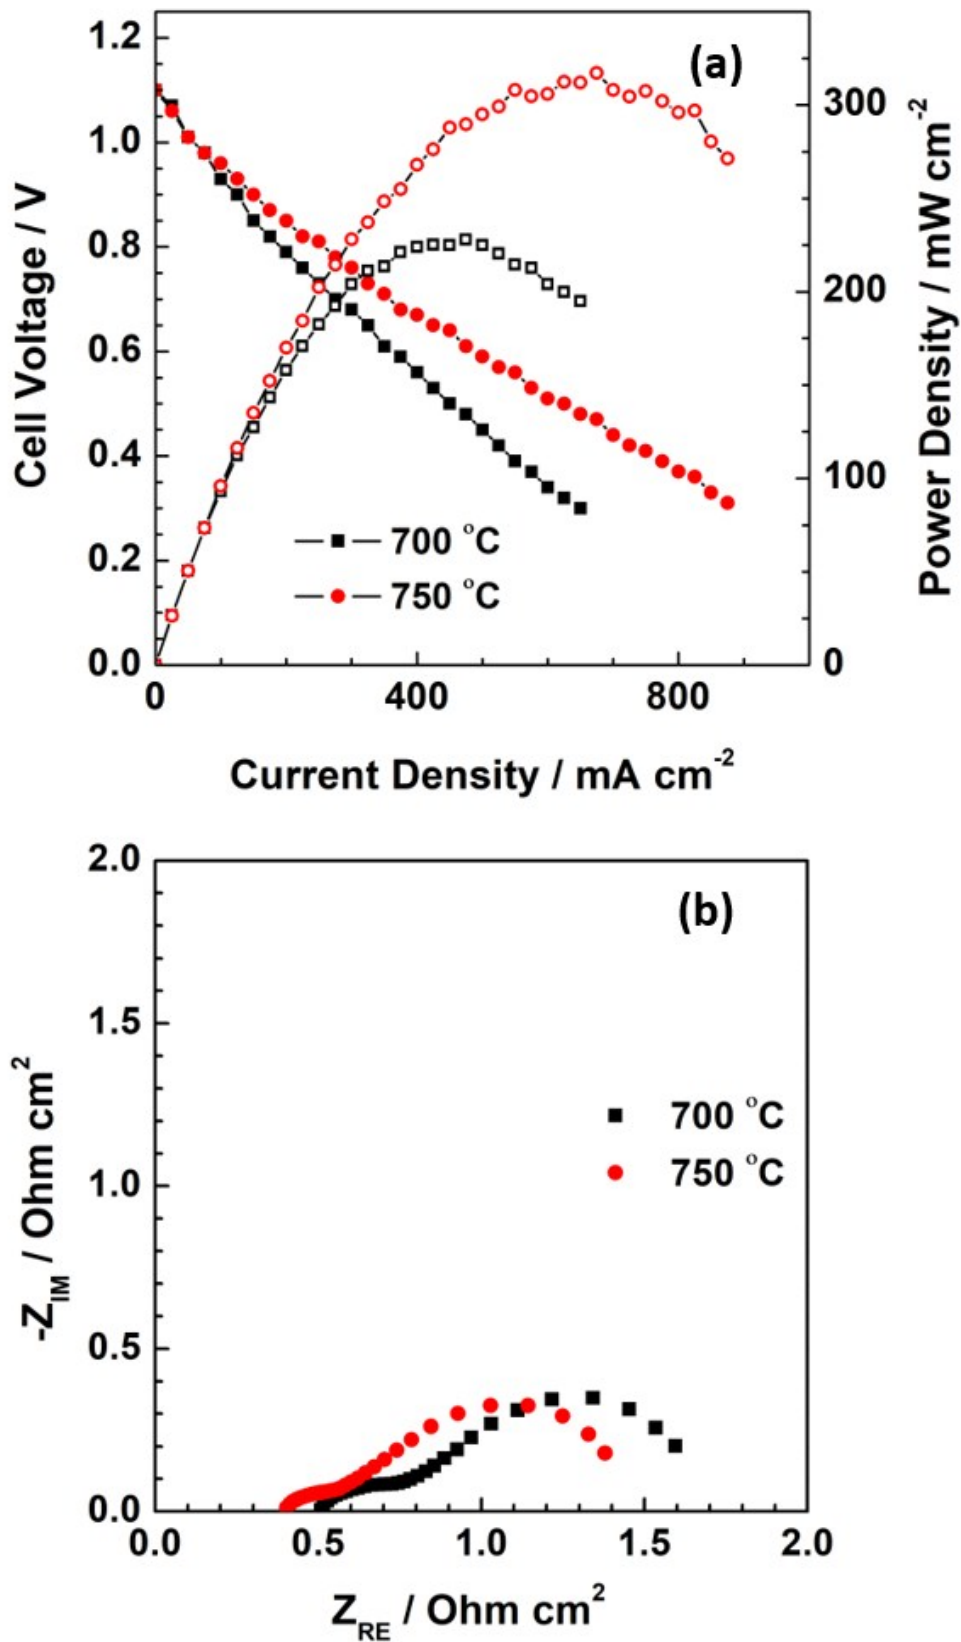

Figure S6: Electrochemical performance of Cell-2 at 700 and 750 °C; (a) polarization curves and (b) impedance plots.

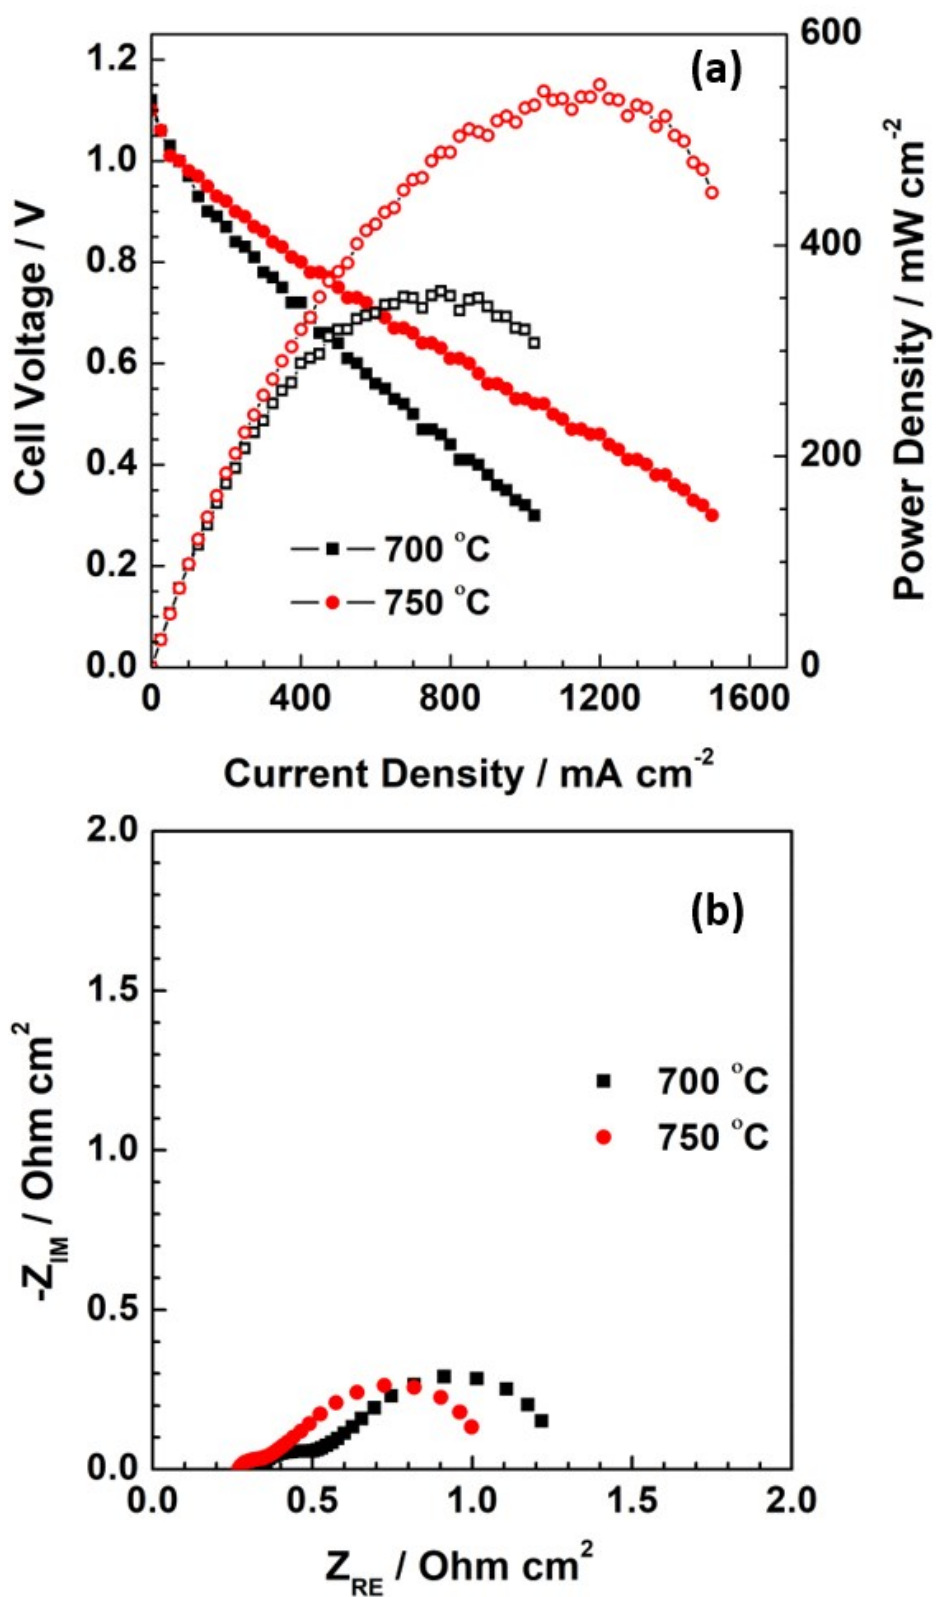

Figure S7: Electrochemical performance of Cell-3 at 700 and 750 °C; (a) polarization curves and (b) impedance plots.

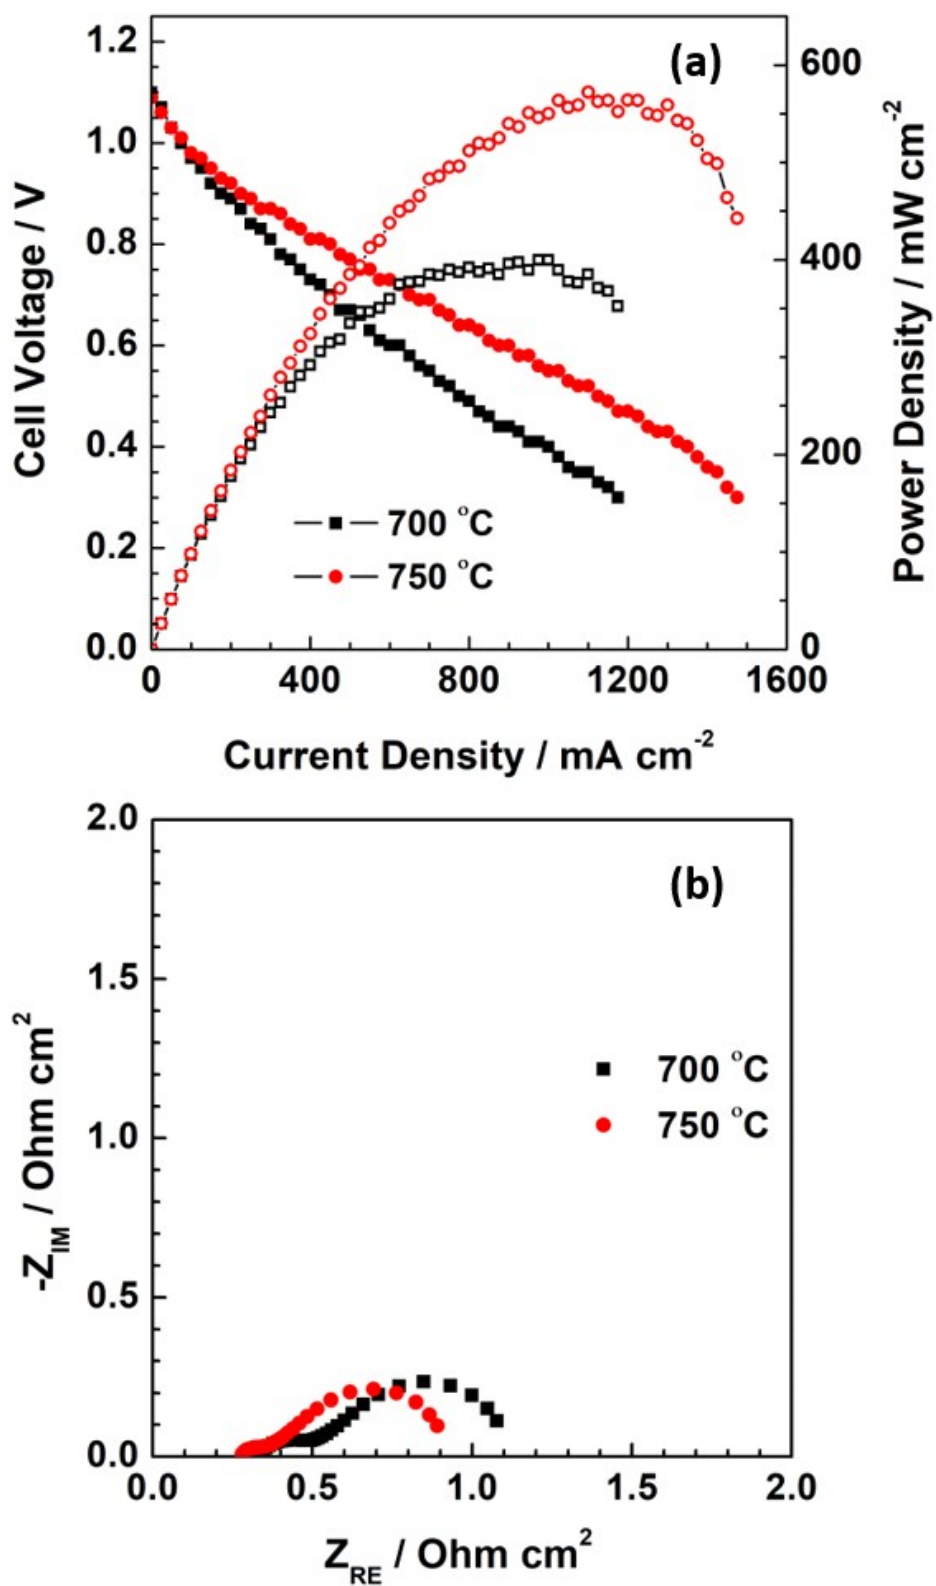

Figure S8: Electrochemical performance of Cell-4 at 700 and 750 °C; (a) polarization curves and (b) impedance plots.

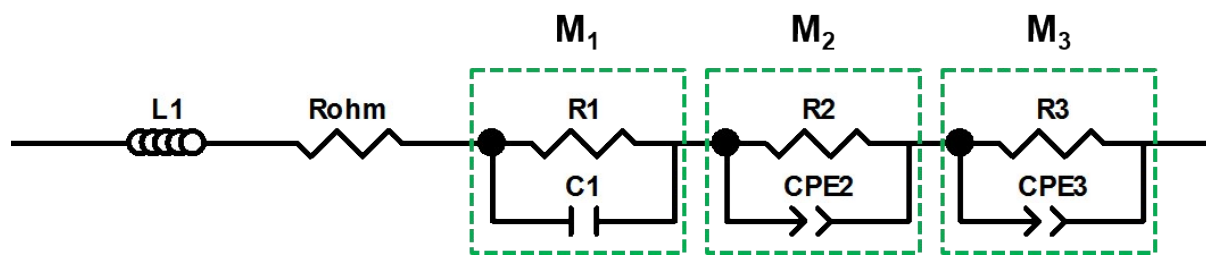

Figure S9: Equivalent circuit model used for the simulation of impedance data of various SOFCs operated at 700, 750 and 800 °C

Table S3: Equivalent circuit model analysis results of various SOFCs operated at 700, 750 and 800 °C

| Sample | Temp. (°C) | Area-specific resistance ( $\Omega \text{ cm}^2$ ) |       |       |       |       |                    |
|--------|------------|----------------------------------------------------|-------|-------|-------|-------|--------------------|
|        |            | $R_{\text{ohm}}$                                   | $R_1$ | $R_2$ | $R_3$ | $R_p$ | $R_{\text{total}}$ |
| Cell-1 | 800        | 0.361                                              | 0.119 | 0.095 | 0.757 | 0.971 | 1.332              |
|        | 750        | 0.427                                              | 0.166 | 0.119 | 0.989 | 1.273 | 1.700              |
|        | 700        | 0.519                                              | 0.235 | 0.148 | 1.130 | 1.513 | 2.032              |
| Cell-2 | 800        | 0.348                                              | 0.108 | 0.088 | 0.638 | 0.834 | 1.182              |
|        | 750        | 0.404                                              | 0.154 | 0.101 | 0.844 | 1.099 | 1.503              |
|        | 700        | 0.511                                              | 0.219 | 0.109 | 0.882 | 1.209 | 1.720              |
| Cell-3 | 800        | 0.241                                              | 0.060 | 0.055 | 0.450 | 0.561 | 0.802              |
|        | 750        | 0.285                                              | 0.097 | 0.074 | 0.623 | 0.793 | 1.078              |
|        | 700        | 0.340                                              | 0.162 | 0.083 | 0.714 | 0.959 | 1.299              |
| Cell-4 | 800        | 0.237                                              | 0.057 | 0.047 | 0.368 | 0.467 | 0.704              |
|        | 750        | 0.275                                              | 0.096 | 0.061 | 0.510 | 0.666 | 0.941              |
|        | 700        | 0.338                                              | 0.160 | 0.081 | 0.573 | 0.794 | 1.134              |
| Cell-5 | 800        | 0.234                                              | 0.058 | 0.046 | 0.346 | 0.450 | 0.684              |
|        | 750        | 0.270                                              | 0.091 | 0.058 | 0.444 | 0.592 | 0.862              |
|        | 700        | 0.334                                              | 0.151 | 0.071 | 0.516 | 0.757 | 1.097              |
